# Supplementary material for: Maternal Lipid Concentrations during Early Pregnancy and Eating Behaviour and Energy Intake in the Offspring
Source: PubMed Central journal article supplement (PMC6115740; doi:10.3390/nu10081026), 2018-08-06
Supplement: nutrients-10-01026-s001.pdf [file nutrients-10-01026-s001.pdf]

**Supplemental table S1.** Non-response analysis

|                                        | Included (%)<br>(n=1463) | Excluded (%)<br>(n=672) | p-value          |
|----------------------------------------|--------------------------|-------------------------|------------------|
| Age (years)                            |                          |                         |                  |
| <25                                    | <b>41 (2.8)</b>          | <b>52 (7.7)</b>         | <b>&lt;0.001</b> |
| 25-35                                  | <b>1171 (80.0)</b>       | <b>530 (78.9)</b>       |                  |
| >35                                    | <b>251 (17.2)</b>        | <b>90 (13.4)</b>        |                  |
| Parity                                 |                          |                         |                  |
| 0                                      | 878 (60.0)               | 404 (60.1)              | 0.963            |
| ≥ 1                                    | 585 (40.0)               | 268 (39.9)              |                  |
| Education after primary school         |                          |                         |                  |
| 0-5 years                              | <b>72 (4.9)</b>          | <b>72 (10.7)</b>        | <b>&lt;0.001</b> |
| 6-10 years                             | <b>490 (33.5)</b>        | <b>276 (41.1)</b>       |                  |
| > 10 years                             | <b>899 (61.5)</b>        | <b>323 (48.1)</b>       |                  |
| Smoking during pregnancy               |                          |                         |                  |
| yes                                    | 119 (8.1)                | 66 (9.8)                | 0.198            |
| no                                     | 1344 (91.9)              | 606 (90.2)              |                  |
| Alcohol intake during pregnancy        |                          |                         |                  |
| yes                                    | <b>489 (33.4)</b>        | <b>187 (27.8)</b>       | <b>0.010</b>     |
| no                                     | <b>973 (66.6)</b>        | <b>485 (72.2)</b>       |                  |
| Pre-pregnancy BMI (kg/m <sup>2</sup> ) |                          |                         |                  |
| < 18.5                                 | 42 (2.9)                 | 31 (4.6)                | 0.223            |
| 18.5-24.9                              | 1178 (80.5)              | 533 (79.3)              |                  |
| 25-29.9                                | 201 (13.7)               | 91 (13.5)               |                  |
| ≥ 30                                   | 42 (2.9)                 | 17 (2.5)                |                  |

**Supplemental table S2.** CEBQ scores according to maternal and offspring characteristics

|                                             | n (%)       | EF (SD)              | FR (SD)              | SR (SD)              | SE (SD)              |
|---------------------------------------------|-------------|----------------------|----------------------|----------------------|----------------------|
| <b>Maternal characteristics</b>             |             |                      |                      |                      |                      |
| Age (years)                                 |             |                      |                      |                      |                      |
| <25                                         | 41 (2.8)    | 2.67 (0.49)          | <b>2.12** (0.65)</b> | 2.36 (0.52)          | 2.46 (0.67)          |
| 25-35 ( <i>reference</i> )                  | 1170 (80.0) | 2.55 (0.48)          | <b>1.87 (0.49)</b>   | 2.32 (0.49)          | 2.41 (0.58)          |
| >35                                         | 251 (17.2)  | 2.58 (0.46)          | 1.91 (0.46)          | 2.28 (0.46)          | 2.38 (0.51)          |
| Parity                                      |             |                      |                      |                      |                      |
| 0                                           | 877 (60.0)  | 2.57 (0.47)          | 1.87 (0.49)          | 2.30 (0.48)          | 2.41 (0.57)          |
| ≥ 1                                         | 585 (40.0)  | 2.56 (0.48)          | 1.90 (0.50)          | 2.34 (0.49)          | 2.41 (0.56)          |
| Education after primary school              |             |                      |                      |                      |                      |
| 0-5 years                                   | 72 (4.9)    | 2.59 (0.51)          | <b>2.03* (0.66)</b>  | 2.38 (0.56)          | 2.45 (0.62)          |
| 6-10 years                                  | 489 (33.5)  | 2.54 (0.48)          | 1.87 (0.50)          | 2.32 (0.50)          | 2.42 (0.52)          |
| > 10 years ( <i>reference</i> )             | 899 (61.6)  | 2.57 (0.47)          | <b>1.88 (0.48)</b>   | 2.31 (0.47)          | 2.40 (0.59)          |
| Smoking during pregnancy                    |             |                      |                      |                      |                      |
| Yes                                         | 119 (8.1)   | 2.51 (0.45)          | 1.89 (0.51)          | 2.40 (0.50)          | 2.47 (0.56)          |
| No                                          | 1343 (91.9) | 2.57 (0.48)          | 1.88 (0.49)          | 2.31 (0.48)          | 2.40 (0.57)          |
| Alcohol intake during pregnancy             |             |                      |                      |                      |                      |
| Yes                                         | 489 (33.5)  | 2.55 (0.50)          | 1.90 (0.49)          | 2.31 (0.50)          | 2.42 (0.58)          |
| No                                          | 972 (66.5)  | 2.57 (0.46)          | 1.87 (0.50)          | 2.32 (0.48)          | 2.40 (0.56)          |
| pBMI (kg/m <sup>2</sup> )                   |             |                      |                      |                      |                      |
| < 18.5                                      | 42 (2.9)    | <b>2.36* (0.54)</b>  | <b>1.60** (0.42)</b> | 2.32 (0.54)          | 2.60 (0.61)          |
| 18.5-24.9 ( <i>reference</i> )              | 1178 (80.6) | <b>2.57 (0.48)</b>   | <b>1.89 (0.49)</b>   | <b>2.31 (0.49)</b>   | 2.41 (0.57)          |
| 25-29.9                                     | 201 (13.7)  | 2.59 (0.43)          | 1.89 (0.48)          | 2.32 (0.46)          | 2.37 (0.57)          |
| ≥ 30                                        | 41 (2.8)    | 2.54 (0.45)          | 1.99 (0.62)          | <b>2.54* (0.52)</b>  | 2.52 (0.45)          |
| Weight gain since pregnancy                 |             |                      |                      |                      |                      |
| Weight loss (> -3kg)                        | 182 (15.4)  | 2.60 (0.47)          | 1.94 (0.57)          | 2.31 (0.49)          | 2.39 (0.58)          |
| Weight stable (+/-3kg) ( <i>reference</i> ) | 864 (73.2)  | 2.56 (0.47)          | 1.87 (0.49)          | 2.30 (0.49)          | 2.39 (0.57)          |
| Weight gain (> +3kg)                        | 374 (31.7)  | 2.54 (0.47)          | 1.88 (0.47)          | 2.35 (0.47)          | 2.46 (0.55)          |
| Prenatal stress                             |             |                      |                      |                      |                      |
| Low                                         | 406 (27.8)  | 2.56 (0.49)          | <b>1.93* (0.51)</b>  | 2.34 (0.48)          | 2.41 (0.55)          |
| High                                        | 1052 (72.2) | 2.56 (0.47)          | <b>1.86 (0.49)</b>   | 2.31 (0.49)          | 2.41 (0.58)          |
| <b>Child characteristics</b>                |             |                      |                      |                      |                      |
| Gender                                      |             |                      |                      |                      |                      |
| Boy                                         | 711 (48.6)  | 2.57 (0.46)          | 1.87 (0.47)          | <b>2.28** (0.47)</b> | <b>2.36** (0.55)</b> |
| Girl                                        | 751 (51.4)  | 2.55 (0.48)          | 1.90 (0.52)          | <b>2.35 (0.49)</b>   | <b>2.45 (0.58)</b>   |
| Birth weight                                |             |                      |                      |                      |                      |
| ≤2500g                                      | 18 (1.2)    | 2.53 (0.58)          | 1.96 (0.61)          | 2.52 (0.66)          | 2.50 (0.51)          |
| 2500-4000g ( <i>reference</i> )             | 1166 (79.9) | <b>2.54 (0.47)</b>   | 1.87 (0.49)          | <b>2.33 (0.49)</b>   | <b>2.43 (0.57)</b>   |
| ≥ 4000g                                     | 276 (18.9)  | <b>2.64** (0.46)</b> | 1.93 (0.52)          | <b>2.25* (0.47)</b>  | <b>2.31** (0.56)</b> |
| Exclusive breastfeeding                     |             |                      |                      |                      |                      |
| None                                        | 223 (15.3)  | 2.58 (0.48)          | 1.88 (0.51)          | 2.32 (0.52)          | 2.41 (0.57)          |
| < 1 month                                   | 69 (4.7)    | 2.53 (0.51)          | 1.84 (0.56)          | 2.34 (0.52)          | 2.45 (0.59)          |
| 1-2.9 months                                | 389 (26.6)  | 2.57 (0.47)          | 1.93 (0.49)          | 2.32 (0.45)          | 2.42 (0.56)          |
| 3-5.9 months                                | 509 (34.8)  | 2.55 (0.47)          | 1.87 (0.48)          | 2.31 (0.48)          | 2.41 (0.57)          |
| ≥ 6 months ( <i>reference</i> )             | 271 (18.5)  | 2.56 (0.46)          | 1.84 (0.50)          | 2.31 (0.50)          | 2.39 (0.58)          |
| Accelerated postnatal growth                |             |                      |                      |                      |                      |
| Yes                                         | 159 (14.0)  | 2.62 (0.47)          | <b>1.96* (0.49)</b>  | 2.28 (0.50)          | 2.37 (0.60)          |
| No                                          | 976 (86.0)  | 2.55 (0.47)          | <b>1.86 (0.48)</b>   | 2.33 (0.49)          | 2.43 (0.55)          |

\* p &lt; 0.05 \*\* p &lt; 0.01 \*\*\* p &lt; 0.001

Accelerated postnatal growth:  $\Delta$  (SDS weight 6 months - SDS 1 month)  $\geq 0.67$ ; EF: Enjoyment of food; FR: Food responsiveness; pBMI: Pre-pregnancy Body mass index; Prenatal stress: measured as general anxiety (STAI score  $\geq 43$ ); SE: Slowness of eating; SR: Satiety responsiveness; Weight gain since pregnancy:  $\Delta$  Maternal weight year 5 - pre-pregnancy weight.

**Supplemental Table S3.** Secondary analysis; Association between prenatal maternal lipid profile and offspring's eating behavior at age 5, all ethnicities included (N=2044)

|              |                       | Enjoyment of Food                | Food Responsiveness           | Satiety Responsiveness        | Slowness of Eating             |
|--------------|-----------------------|----------------------------------|-------------------------------|-------------------------------|--------------------------------|
|              |                       | $\beta$ (95%CI)                  | $\beta$ (95%CI)               | $\beta$ (95%CI)               | $\beta$ (95%CI)                |
| TC (mmol/L)  | Crude                 | <b>-0.034* (-0.060, -0.008)</b>  | -0.001 (-0.028, 0.025)        | <b>0.040** (0.013, 0.066)</b> | <b>0.052*** (0.021, 0.082)</b> |
|              | Adjusted <sup>1</sup> | <b>-0.038** (-0.065, -0.012)</b> | -0.007 (-0.034, 0.020)        | <b>0.040** (0.013, 0.066)</b> | <b>0.051** (0.020, 0.081)</b>  |
| ApoA1 (g/L)  | Crude                 | -0.085 (-0.185, 0.016)           | -0.061 (-0.163, 0.041)        | 0.048 (-0.054, 0.151)         | 0.102 (-0.015, 0.219)          |
|              | Adjusted <sup>1</sup> | <b>-0.104* (-0.206, -0.002)</b>  | -0.061 (-0.165, 0.042)        | 0.084 (-0.019, 0.187)         | 0.110 (-0.008, 0.228)          |
| ApoB (g/L)   | Crude                 | <b>-0.144* (-0.275, -0.013)</b>  | 0.022 (-0.111, 0.156)         | <b>0.185** (0.052, 0.318)</b> | <b>0.224** (0.071, 0.376)</b>  |
|              | Adjusted <sup>1</sup> | <b>-0.137* (-0.271, -0.002)</b>  | -0.006 (-0.143, 0.131)        | 0.129 (-0.007, 0.265)         | <b>0.202* (0.045, 0.358)</b>   |
| TG (mmol/L)  | Crude                 | <b>0.043* (0.002, 0.085)</b>     | <b>0.071** (0.029, 0.113)</b> | -0.008 (-0.051, 0.035)        | 0.009 (-0.039, 0.057)          |
|              | Adjusted <sup>1</sup> | <b>0.056* (0.013, 0.098)</b>     | <b>0.068** (0.024, 0.111)</b> | -0.032 (-0.075, 0.011)        | -0.003 (-0.052, 0.047)         |
| FFA (mmol/L) | Crude                 | 0.013 (-0.120, 0.146)            | 0.071 (-0.064, 0.207)         | <b>0.144* (0.009, 0.279)</b>  | 0.099 (-0.056, 0.253)          |
|              | Adjusted <sup>1</sup> | 0.042 (-0.094, 0.178)            | 0.046 (-0.091, 0.184)         | 0.074 (-0.062, 0.211)         | 0.063 (-0.093, 0.218)          |

\* p <0.05    \*\* p <0.01    \*\*\* p <0.001

ApoA1: Apolipoprotein A1 (g/L); ApoB Apolipoprotein B (g/L); FFA: Free fatty acids (mmol/L); TC: Total cholesterol (mmol/L); TG: Triglycerides (mmol/L). All lipids interpolated for mean gestational age at blood sampling (90 days).

Adjusted for: ethnicity, educational status, pre-pregnancy Body Mass Index, parity, prenatal maternal stress, offspring's gender, duration exclusive breastfeeding, increased infant growth, maternal weight gain since pregnancy.

**Supplemental table S4.** Secondary analysis; Association between prenatal maternal lipid profile and offspring's food intake at age 5 including all ethnicities (N=2044)

|              |                       | Kcal intake (kcal/d)               | Fat intake (g/d)             | Carbohydrate intake (g/d)       |
|--------------|-----------------------|------------------------------------|------------------------------|---------------------------------|
|              |                       | $\beta$ (95%CI)                    | $\beta$ (95%CI)              | $\beta$ (95%CI)                 |
| TC (mmol/L)  | crude                 | <b>-31.30** (-53.06, -9.55)</b>    | <b>-1.16* (-2.10, -0.23)</b> | <b>-4.06** (-6.92, -1.19)</b>   |
|              | adjusted <sup>1</sup> | <b>-26.05* (-47.64, -4.45)</b>     | <b>-1.01* (-1.94, -0.07)</b> | <b>-3.28* (-6.14, -0.42)</b>    |
| ApoA1 (g/L)  | crude                 | <b>-120.48** (-203.63, -37.33)</b> | -3.13 (-6.70, 0.44)          | <b>-17.81** (-28.80, -6.83)</b> |
|              | adjusted <sup>1</sup> | <b>-99.02* (-181.20, -16.84)</b>   | -2.20 (-5.73, 1.34)          | <b>-15.67** (-26.58, -4.76)</b> |
| ApoB (g/L)   | crude                 | -45.20 (-154.04, 63.64)            | -2.52 (-7.18, 2.14)          | -5.37 (-19.75, 9.02)            |
|              | adjusted <sup>1</sup> | -52.65 (-162.58, 57.27)            | -3.29 (-8.01, 1.43)          | -5.03 (-19.63, 9.58)            |
| TG (mmol/L)  | crude                 | 28.06 (-6.68, 62.81)               | 0.86 (-0.64, 2.35)           | 4.10 (-0.48, 8.68)              |
|              | adjusted <sup>1</sup> | 15.64 (-19.50, 50.79)              | 0.30 (-1.22, 1.82)           | 2.77 (-1.88, 7.41)              |
| FFA (mmol/L) | crude                 | 40.97 (-68.18, 150.12)             | 2.53 (-2.15, 7.20)           | 2.47 (-11.96, 16.90)            |
|              | adjusted <sup>1</sup> | 11.54 (-97.02, 120.10)             | 1.38 (-3.28, 6.04)           | -1.18 (-15.60, 13.24)           |

\* p <0.05    \*\* p <0.01    \*\*\* p <0.001

Adjusted for: ethnicity, educational status, pregravid Body Mass Index, parity, prenatal maternal stress, offspring's gender, duration exclusive breastfeeding, increased infant growth, maternal weight gain since pregnancy.

ApoA1: Apolipoprotein A1 (g/L); ApoB Apolipoprotein B (g/L); FFA: Free fatty acids (mmol/L); TC: Total cholesterol (mmol/L); TG: Triglycerides (mmol/L). All lipids interpolated for mean gestational age at blood sampling (90 days).
